# Supplementary material for: Dietary saturated fat and fibre and risk of cardiovascular disease and all-cause mortality among type 1 diabetic patients: the EURODIAB Prospective Complications Study
Source: PubMed Central journal article supplement (PMC3390695; doi:10.1007/s00125-012-2550-0), 2012-04-12
Supplement: 125_2012_2550_MOESM1_ESM.pdf [file 125_2012_2550_MOESM1_ESM.pdf]

## Electronic supplementary material

**ESM Table 1** Baseline CVD risk factors for participants in the EURODIAB PCS included and excluded for the present study

|                                                       | Study participants | Excluded participants | <i>p</i> -value <sup>a</sup> |
|-------------------------------------------------------|--------------------|-----------------------|------------------------------|
| <i>n</i>                                              | 2,108              | 1,142                 |                              |
| Age, years                                            | 32.1 ± 9.7         | 33.8 ± 9.8            | <0.0001                      |
| Sex, <i>n</i> (%) male                                | 1,081 (51.3)       | 570 (49.9)            | 0.97                         |
| Diabetes duration, years                              | 14.3 ± 9.0         | 15.4 ± 9.2            | 0.003                        |
| Daily insulin dose, units/kg                          | 0.7 ± 0.2          | 0.7 ± 0.2             | 0.55                         |
| Daily insulin frequency, injections per day           | 2.6 ± 0.7          | 2.7 ± 0.7             | 0.07                         |
| HbA <sub>1c</sub> , % (mmol/mol)                      | 8.3 ± 1.9 (67.2)   | 8.6 ± 2.0 (70.5)      | 0.01                         |
| Systolic blood pressure, mmHg                         | 120.0 ± 16.8       | 123.7 ± 17.3          | <0.0001                      |
| Diastolic blood pressure, mmHg                        | 75.1 ± 11.2        | 76.2 ± 11.3           | 0.08                         |
| Antihypertensive use, <i>n</i> (%)                    | 160 (7.6)          | 171 (15.0)            | <0.0001                      |
| BMI, kg/m <sup>2</sup>                                | 23.5 ± 2.8         | 23.8 ± 3.2            | <0.0001                      |
| Triacylglycerol, mmol/l                               | 1.1 ± 0.7          | 1.3 ± 0.7             | <0.0001                      |
| Cholesterol, mmol/l                                   | 5.3 ± 1.1          | 5.4 ± 1.2             | 0.05                         |
| HDL-cholesterol, mmol/l                               | 1.5 ± 0.4          | 1.4 ± 0.6             | 0.03                         |
| LDL-cholesterol, mmol/l                               | 3.3 ± 1.0          | 3.4 ± 1.0             | 0.26                         |
| Total:HDL-cholesterol ratio, mmol/l                   | 3.5 ± 1.2          | 3.9 ± 1.6             | <0.0001                      |
| Moderate physical activity ≥1 time/week, <i>n</i> (%) | 1,427 (67.7)       | 726 (63.6)            | 0.02                         |
| Ever smoker, <i>n</i> (%)                             | 1,018 (48.3)       | 605 (53.0)            | 0.03                         |
| Total energy intake, kJ/day                           | 10,063.5 ± 2,911.5 | 9,589.6 ± 3,102.3     | 0.03                         |
| Alcohol intake, g/day                                 | 7.6 ± 15.6         | 5.9 ± 15.7            | <0.0001                      |
| Total fat, g/day <sup>b</sup>                         | 97.9 ± 36.0        | 100.5 ± 36.6          | <0.0001                      |
| Total fat, en%                                        | 37.5 ± 7.1         | 39.0 ± 8.0            | 0.02                         |
| SFA, g/day <sup>b</sup>                               | 36.9 ± 15.6        | 38.5 ± 16.5           | 0.0002                       |
| SFA, en%                                              | 13.7 ± 3.4         | 14.6 ± 3.6            | 0.00                         |
| PUFA, g/day <sup>b</sup>                              | 15.9 ± 9.5         | 16.9 ± 10.3           | 0.004                        |
| MUFA, g/day <sup>b</sup>                              | 36.4 ± 15.2        | 39.4 ± 15.3           | <0.0001                      |
| Total fibre, g/day <sup>b</sup>                       | 19.2 ± 7.5         | 17.1 ± 6.9            | <0.0001                      |
| Total fibre, g/1000 kcal                              | 8.7 ± 3.9          | 7.6 ± 3.8             | <0.0001                      |
| Soluble fibre, g/day <sup>b</sup>                     | 6.0 ± 2.4          | 5.6 ± 1.3             | <0.0001                      |
| Insoluble fibre, g/day <sup>b</sup>                   | 13.1 ± 5.2         | 11.5 ± 4.9            | <0.0001                      |

<sup>a</sup> *p* values from Chi-squared test

<sup>b</sup> Nutrient intakes were adjusted for total energy intake by using the nutrient residual method (31).
