# Supplementary material for: Dietary saturated fat and fibre and risk of cardiovascular disease and all-cause mortality among type 1 diabetic patients: the EURODIAB Prospective Complications Study
Source: PubMed Central journal article supplement (PMC3390695; doi:10.1007/s00125-012-2550-0), 2012-04-12
Supplement: 125_2012_2550_MOESM3_ESM.pdf [file 125_2012_2550_MOESM3_ESM.pdf]

**Electronic supplementary material**

**ESM Table 3** HR for fatal and nonfatal CVD according to total, soluble, and insoluble fibre intake in participants in the EURODIAB PCS: additional adjustments for potential mediators ( $n=2,108$ )

| Intake          | <i>n</i>                  | Tertiles of fibre intake |                         |                         | <i>p</i> -value for trend | Per 2 g/day       | Per 5 g/day       |
|-----------------|---------------------------|--------------------------|-------------------------|-------------------------|---------------------------|-------------------|-------------------|
|                 |                           | 1                        | 2                       | 3                       |                           |                   |                   |
| Total fibre     | Median intake g/day (IQR) | 702<br>13.4 (11.3-14.7)  | 703<br>18.6 (17.2-19.8) | 703<br>25.2 (22.8-28.3) |                           |                   |                   |
|                 | <i>n</i> cases            | 50                       | 60                      | 38                      |                           |                   |                   |
|                 | Person-years              | 5,141                    | 5,102                   | 5,066                   |                           |                   |                   |
|                 | Model 1 <sup>a</sup>      | 1.00                     | 1.09 (0.78, 1.70)       | 0.69 (0.43, 1.11)       | 0.05                      | 0.93 (0.72, 0.98) | 0.84 (0.72, 0.98) |
|                 | Model 2 <sup>b</sup>      | 1.00                     | 1.03 (0.65, 1.63)       | 0.69 (0.40, 1.21)       | 0.05                      | 0.91 (0.84, 0.98) | 0.80 (0.66, 0.97) |
|                 | Model 3 <sup>c</sup>      | 1.00                     | 1.12 (0.76, 1.66)       | 0.67 (0.42, 1.08)       | 0.03                      | 0.93 (0.87, 0.99) | 0.84 (0.72, 0.99) |
|                 | Model 4 <sup>d</sup>      | 1.00                     | 1.16 (0.79, 0.72)       | 0.69 (0.43, 1.11)       | 0.03                      | 0.93 (0.87, 0.99) | 0.85 (0.73, 0.99) |
| Soluble fibre   | Median intake g/day (IQR) | 4.1 (3.5-4.6)            | 5.8 (5.4-6.3)           | 7.9 (7.2-9.2)           |                           |                   |                   |
|                 | <i>n</i> cases            | 55                       | 56                      | 37                      |                           |                   |                   |
|                 | Person-years              | 5,149                    | 5,073                   | 5,087                   |                           |                   |                   |
|                 | Model 1 <sup>a</sup>      | 1.00                     | 0.98 (0.66, 1.45)       | 0.56 (0.35, 0.90)       | 0.01                      | 0.80 (0.67, 0.97) | 0.61 (0.38, 0.97) |
|                 | Model 2 <sup>b</sup>      | 1.00                     | 1.01 (0.64, 1.61)       | 0.56 (0.32, 0.98)       | 0.01                      | 0.79 (0.63, 0.99) | 0.55 (0.31, 0.98) |
|                 | Model 3 <sup>c</sup>      | 1.00                     | 0.97 (0.65, 1.44)       | 0.55 (0.34, 0.88)       | 0.01                      | 0.82 (0.68, 0.99) | 0.61 (0.38, 0.98) |
|                 | Model 4 <sup>d</sup>      | 1.00                     | 0.99 (0.67, 1.46)       | 0.57 (0.35, 0.91)       | 0.01                      | 0.83 (0.68, 0.99) | 0.62 (0.39, 0.99) |
| Insoluble fibre | Median intake g/day (IQR) | 8.9 (7.6-9.9)            | 12.5 (11.7-13.5)        | 17.3 (15.6-19.5)        |                           |                   |                   |
|                 | <i>n</i> cases            | 48                       | 57                      | 43                      |                           |                   |                   |
|                 | Person-years              | 5,144                    | 5,103                   | 5,062                   |                           |                   |                   |
|                 | Model 1 <sup>a</sup>      | 1.00                     | 1.05 (0.71, 1.57)       | 0.76 (0.48, 1.21)       | 0.21                      | 0.89 (0.81, 0.97) | 0.76 (0.61, 0.94) |
|                 | Model 2 <sup>b</sup>      | 1.00                     | 1.01 (0.64, 1.62)       | 0.75 (0.43, 1.31)       | 0.30                      | 0.87 (0.78, 0.98) | 0.71 (0.54, 0.94) |
|                 | Model 3 <sup>c</sup>      | 1.00                     | 1.05 (0.71, 1.57)       | 0.73 (0.45, 1.16)       | 0.19                      | 0.89 (0.82, 0.97) | 0.75 (0.60, 0.94) |
|                 | Model 4 <sup>d</sup>      | 1.00                     | 1.06 (0.71, 1.58)       | 0.77 (0.48, 1.22)       | 0.20                      | 0.90 (0.82, 0.98) | 0.76 (0.61, 0.95) |

Values are HR (95% CIs) obtained from Cox proportional hazards models according to stratification by tertiles of total, soluble, and insoluble fibre intake and continuously per 2 g/day and 5 g/day increase in total, soluble, and insoluble fibre intake. Fibre intake was adjusted for total energy intake (kJ/day) by using the nutrient residual method (31).

<sup>a</sup> Model 1 adjusted for age (continuous), sex and energy intake (kJ/day), diabetes duration (years), HbA<sub>1c</sub> (%), smoking status (no, previous, current), physical activity (physical inactivity, mild PA  $\geq 1$  time/week, moderate PA  $\geq 1$  time/week and vigorous PA  $\geq 1$  time/week), alcohol intake (0, >0-<5, 5-<15, 15-<30, 30-<40, and  $\geq 40$  g/day), and SFA intake (en%)

<sup>b</sup> Model 2 additionally adjusted for Total:HDL-cholesterol ratio (mmol/l)

<sup>c</sup> Model 3 additionally adjusted for systolic and diastolic blood pressure (mmHg)

<sup>d</sup> Model 4 additionally adjusted for BMI (BMI <25 kg/m<sup>2</sup>, BMI 25-30 kg/m<sup>2</sup>, and BMI >30 kg/m<sup>2</sup>)
