# Supplementary material for: Dietary saturated fat and fibre and risk of cardiovascular disease and all-cause mortality among type 1 diabetic patients: the EURODIAB Prospective Complications Study
Source: PubMed Central journal article supplement (PMC3390695; doi:10.1007/s00125-012-2550-0), 2012-04-12
Supplement: 125_2012_2550_MOESM4_ESM.pdf [file 125_2012_2550_MOESM4_ESM.pdf]

## Electronic supplementary material

**ESM Table 4** HR for all-cause mortality according to each increase of 2 g/day and 5 g/day total, soluble, and insoluble fibre intake in participants in the EURODIAB PCS: additional adjustments for potential mediators ( $n=2,108$ ,  $n$  cases=46)

| Intake          |                      | Per 2 g/day       | Per 5 g/day       |
|-----------------|----------------------|-------------------|-------------------|
| Total fibre     | Model 1 <sup>a</sup> | 0.87 (0.78, 0.95) | 0.72 (0.55, 0.95) |
|                 | Model 2 <sup>b</sup> | 0.80 (0.68, 0.94) | 0.57 (0.39, 0.85) |
|                 | Model 3 <sup>c</sup> | 0.88 (0.78, 0.98) | 0.72 (0.54, 0.95) |
|                 | Model 4 <sup>d</sup> | 0.88 (0.79, 0.98) | 0.72 (0.55, 0.95) |
| Soluble fibre   | Model 1 <sup>a</sup> | 0.63 (0.45, 0.87) | 0.34 (0.14, 0.80) |
|                 | Model 2 <sup>b</sup> | 0.50 (0.31, 0.80) | 0.17 (0.05, 0.58) |
|                 | Model 3 <sup>c</sup> | 0.64 (0.46, 0.91) | 0.33 (0.14, 0.79) |
|                 | Model 4 <sup>d</sup> | 0.65 (0.46, 0.91) | 0.34 (0.14, 0.80) |
| Insoluble fibre | Model 1 <sup>a</sup> | 0.84 (0.72, 0.97) | 0.66 (0.45, 0.97) |
|                 | Model 2 <sup>b</sup> | 0.76 (0.61, 0.94) | 0.50 (0.29, 0.87) |
|                 | Model 3 <sup>c</sup> | 0.85 (0.73, 0.99) | 0.66 (0.45, 0.97) |
|                 | Model 4 <sup>d</sup> | 0.85 (0.73, 0.99) | 0.66 (0.45, 0.97) |

Values are HRs and 95% CIs obtained from Cox proportional hazards models according to each 2 g/day and 5 g/day increase in total, soluble, and insoluble fibre. Fibre intake was adjusted for total energy intake (kJ/day) using the nutrient residual method (31).

<sup>a</sup> Model 1 adjusted for age (continuous), sex and energy intake (kJ/day), diabetes duration (years), HbA<sub>1c</sub> (%), smoking status (no, previous, current), physical activity (physical inactivity, mild PA  $\geq 1$  time/week, moderate PA  $\geq 1$  time/week and vigorous PA  $\geq 1$  time/week), alcohol intake (0,  $>0$ - $<5$ ,  $5$ - $<15$ ,  $15$ - $<30$ ,  $30$ - $<40$ , and  $\geq 40$  g/day), and SFA intake (en%)

<sup>b</sup> Model 2 additionally adjusted for Total:HDL-cholesterol ratio (mmol/l)

<sup>c</sup> Model 3 additionally adjusted for systolic and diastolic blood pressure (mmHg)

<sup>d</sup> Model 4 additionally adjusted for BMI (BMI  $<25$  kg/m<sup>2</sup>, BMI 25-30 kg/m<sup>2</sup>, and BMI  $>30$  kg/m<sup>2</sup>)
